# Supplementary material
Source: MDPI journal article supplement (https://www.mdpi.com/2311-7524/7/10/355)
Supplement: s1 [file s1]

# Supplementary Material

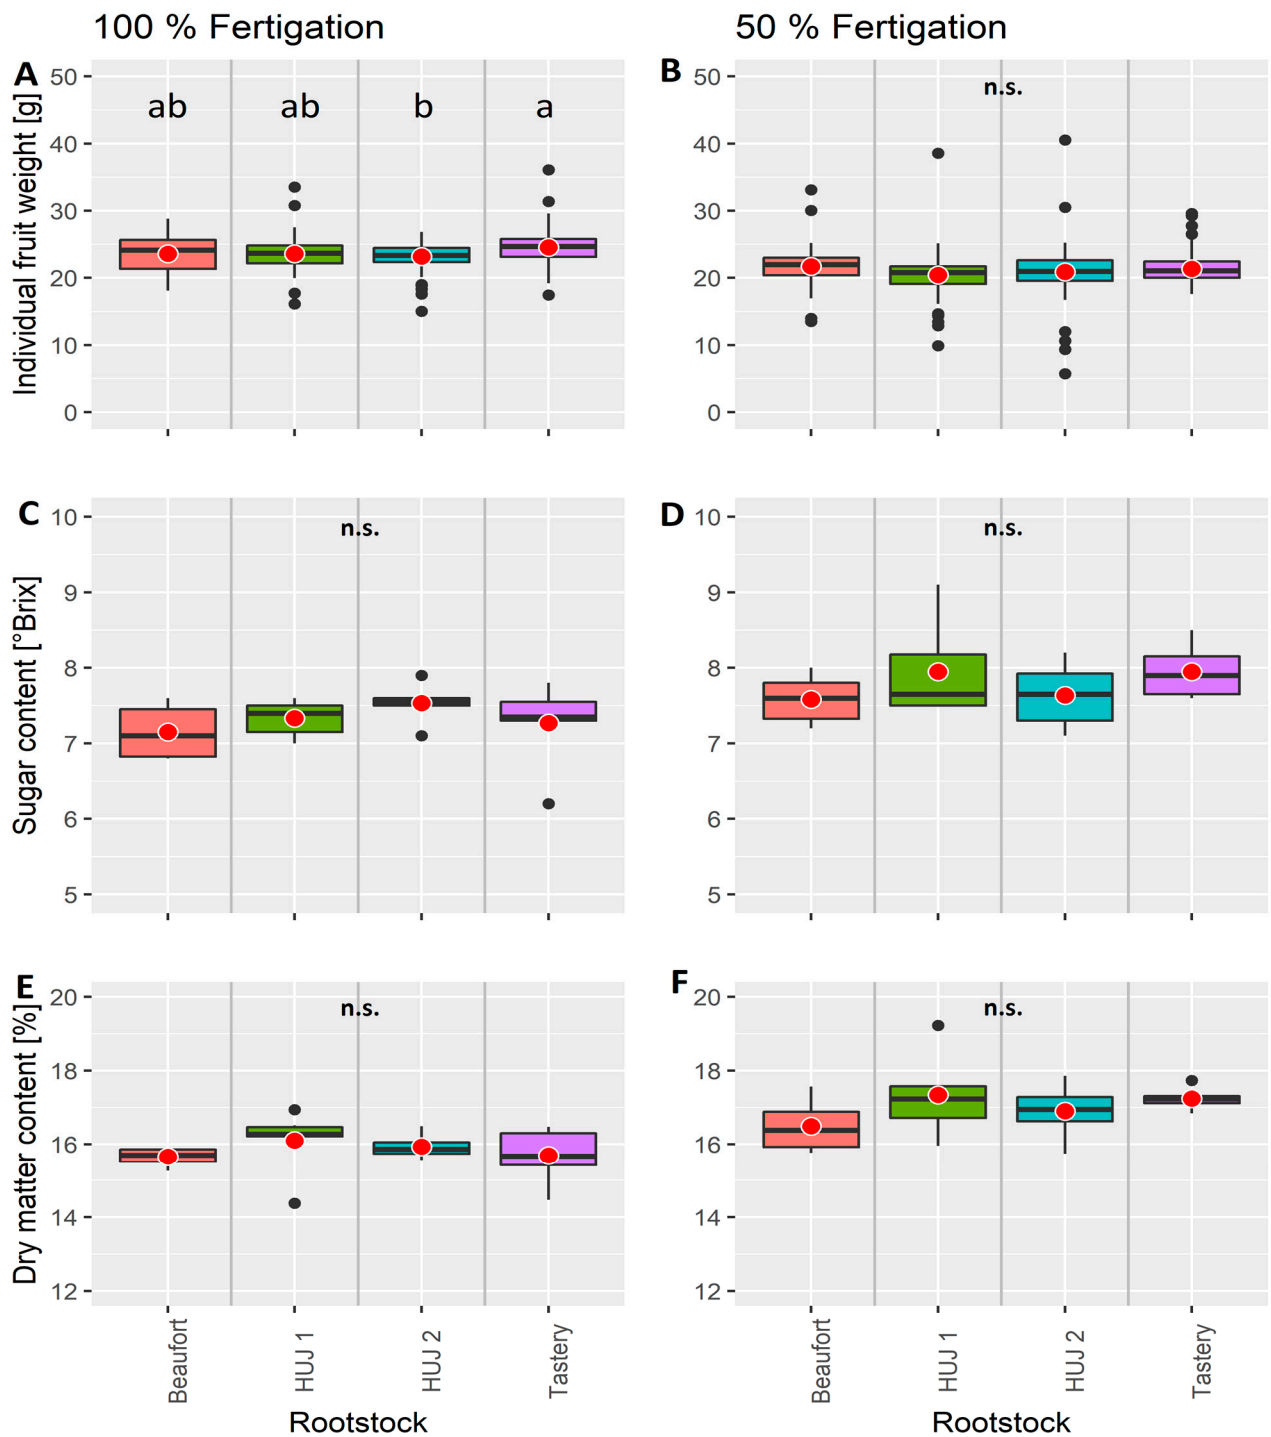

**Figure S1:** Quality parameters of “Tastery” fruits grafted on four different rootstocks and supplied with optimal (A, C, E) and reduced (B, D, F) fertigation: Individual fruit weight [g] (n = 77-84), (A, B); total soluble solids (“sugar”) content of ripe fruits [°Brix] (n = 6), (C, D); fruit dry matter content [%] (n = 6) (E, F). n.s.: not significant, p-value 0.05.

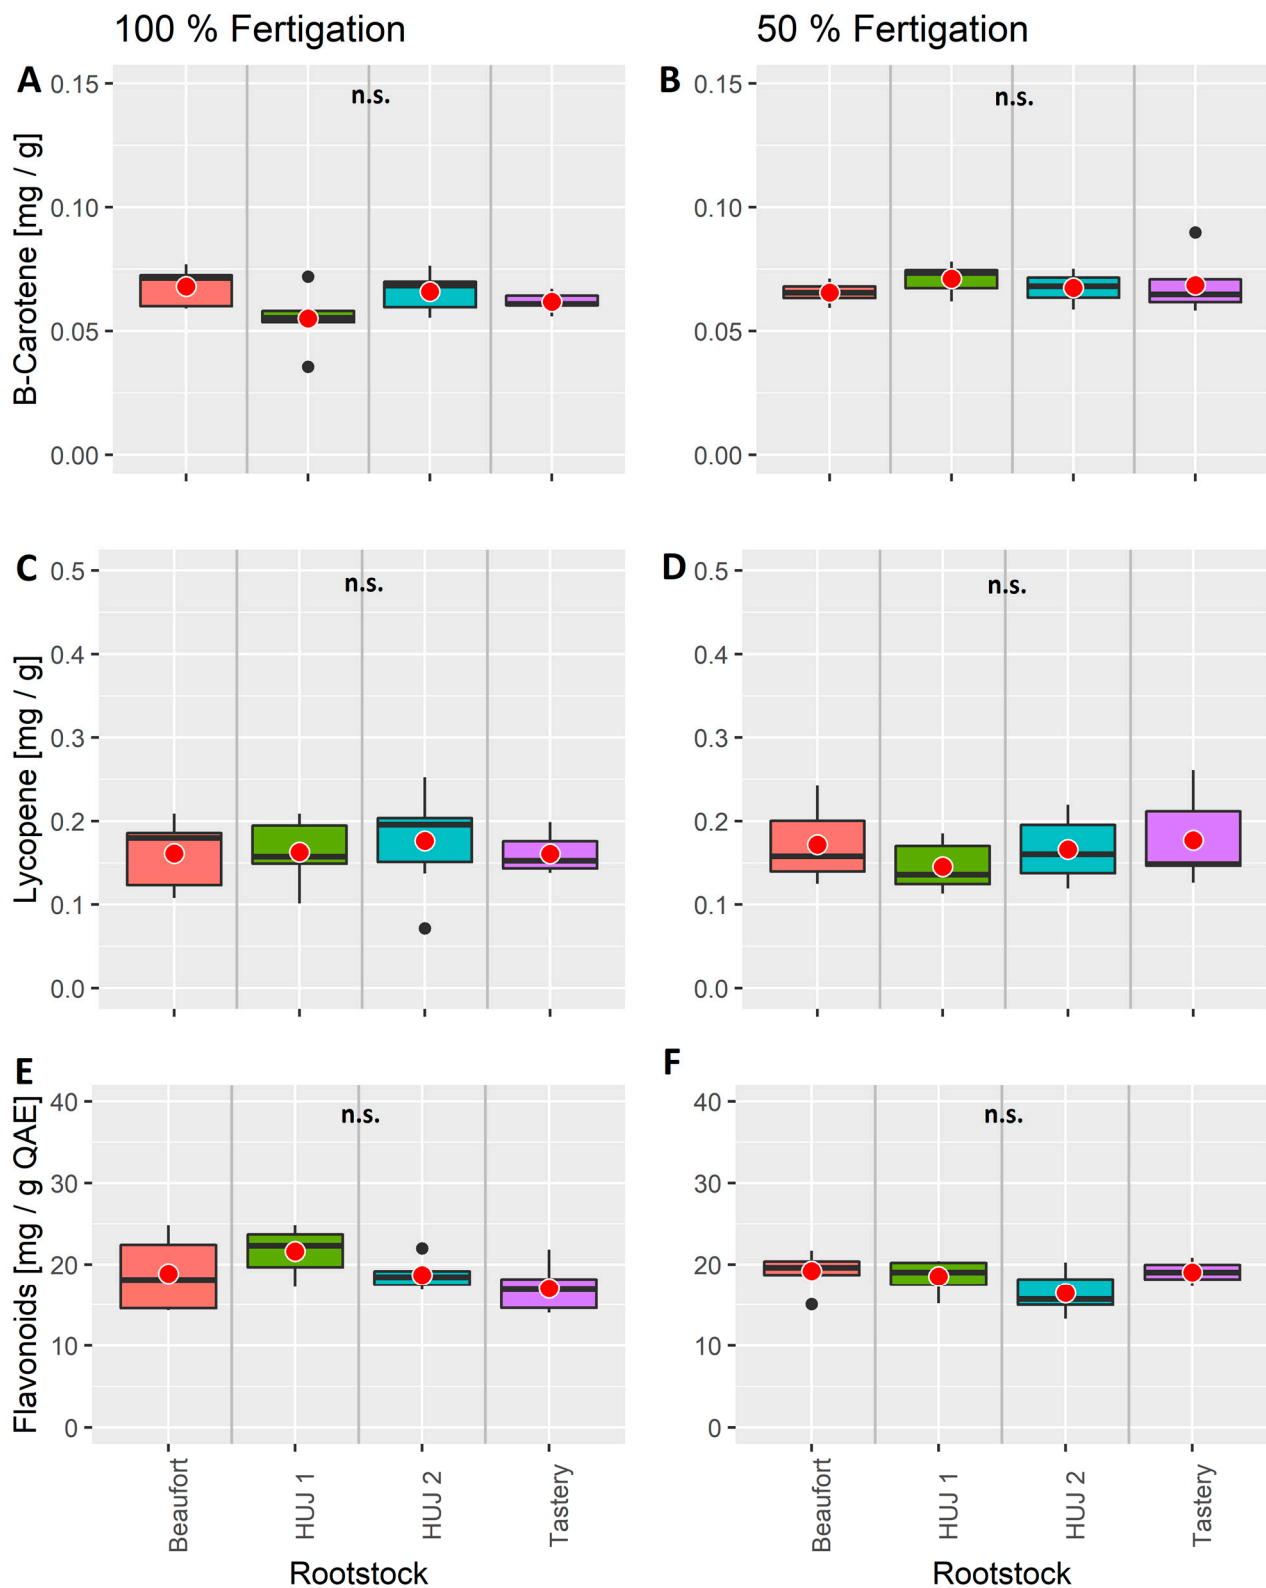

**Figure S2:** Quality parameters of “Tastery” fruits grafted on four different rootstocks and supplied with optimal (A, C, E) and reduced (B, D, F) fertigation:  $\beta$ -carotene content [mg / g DM] (n = 6), (A, B); Lycopene content [mg / g DM] (n = 6), (C, D); flavonoid content [Quercetin equivalents] (n = 6) (E, F). n.s.: not significant, p-value 0.05.

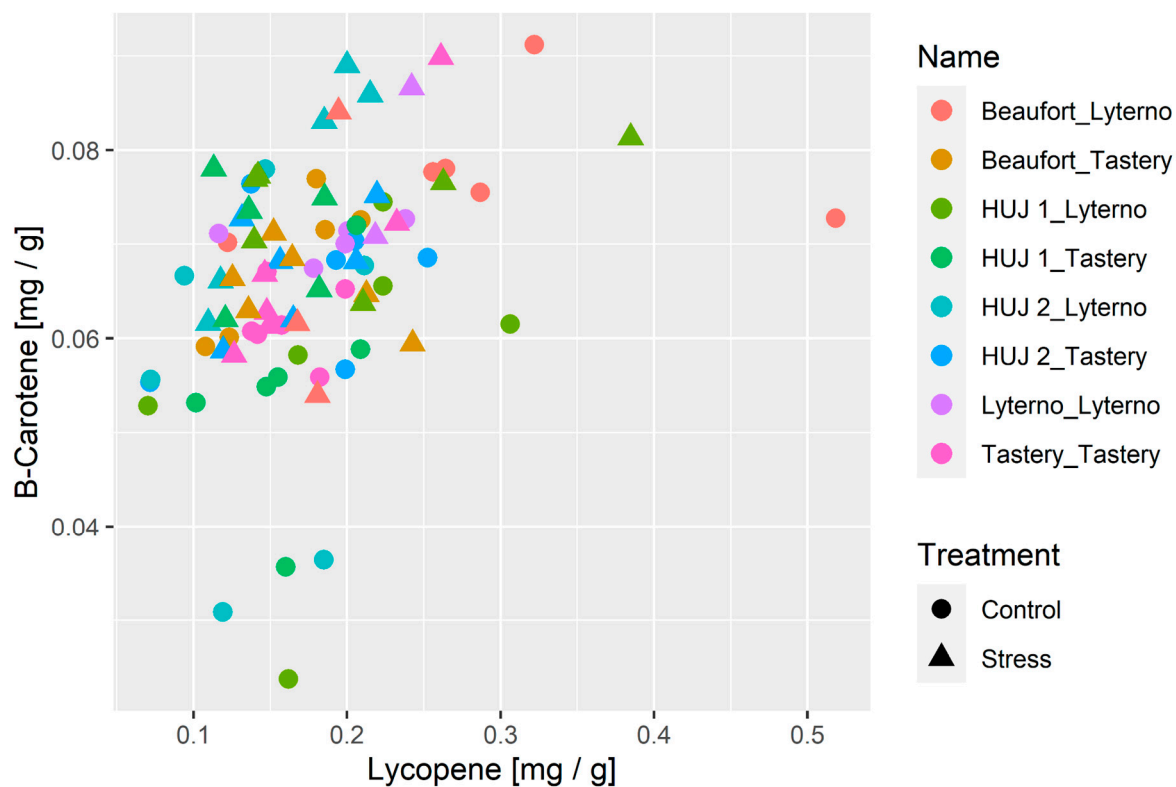

**Figure S3:** Comparison of lycopene and  $\beta$ -Carotene contents of ripe tomatoes from 8 rootstock \* scion – combinations supplied with optimal („control“) and reduced fertigation (50 % reduction; „stress“).

**Table S1.** Tukey comparison of means for plants with the scion Lyterno under stress conditions (Fig. 1).  $p = 0.95$ .

| Rootstocks         | Difference | Lower bound | Upper bound | p adjusted |
|--------------------|------------|-------------|-------------|------------|
| HUJ 1 - Beaufort   | 1110.6     | 66.8        | 2154.4      | 0.033      |
| HUJ 2 - Beaufort   | 1340.8     | 297.0       | 2384.6      | 0.007      |
| Lyterno - Beaufort | 992.4      | -71.5       | 2056.3      | 0.075      |
| HUJ 2 - HUJ 1      | 230.1      | -690.4      | 1150.7      | 0.906      |
| Lyterno - HUJ 1    | -118.2     | -1061.5     | 825.0       | 0.986      |
| Lyterno - HUJ 2    | -348.4     | -1291.7     | 594.9       | 0.753      |
